# Supplementary material for: Synergistic Antimicrobial Activity of Supplemented Medical-Grade Honey against Pseudomonas aeruginosa Biofilm Formation and Eradication
Source: Antibiotics (Basel). 2020 Dec 4;9(12):866. doi: 10.3390/antibiotics9120866 (PMC7761815; doi:10.3390/antibiotics9120866)
Supplement: Supplementary file 1 [file antibiotics-09-00866-s001.pdf]

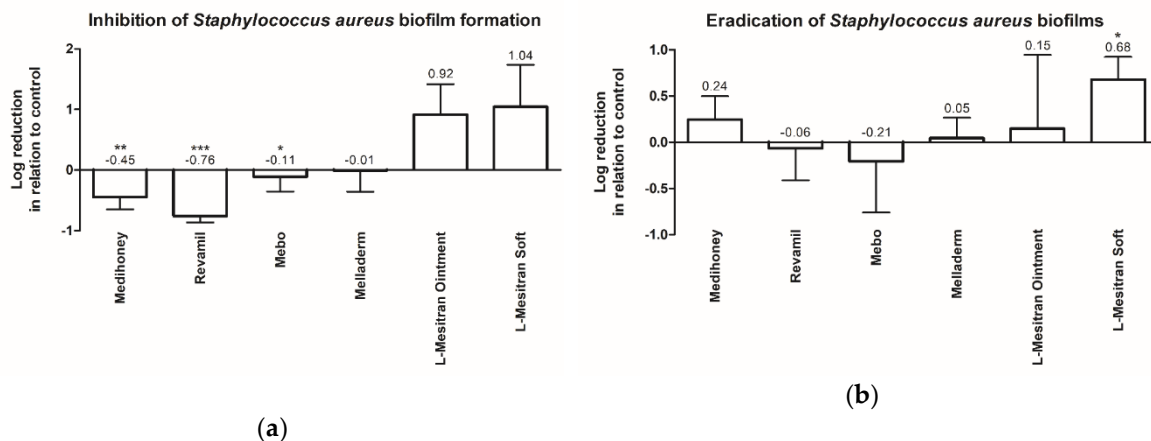

**Figure S1.** Antimicrobial activity of different natural products on *Staphylococcus aureus* (Mu50) biofilms. Data are presented as mean log reduction  $\pm$  standard deviation in relation to control. **(a)** Inhibition of *Staphylococcus aureus* biofilm formation. L-Mesitran Soft was significantly stronger compared to control, Medihoney, Revamil, and Mebo, as indicated by \* above each column (\* $p < 0.05$ , \*\* $p < 0.01$ , \*\*\* $p < 0.001$ ). L-Mesitran Ointment was significantly stronger than Medihoney (\* $p < 0.05$ ) and Revamil (\* $p < 0.01$ ) (not shown in the graph). No other significant differences were observed. **(b)** Eradication of *Staphylococcus aureus* biofilms. L-Mesitran Soft was significantly stronger (\* $p < 0.05$ ) compared to the control group as indicated by \* above the column. No other significant differences were observed.
